# Supplementary material for: The early transcriptome response of cassava (Manihot esculenta Crantz) to mealybug (Phenacoccus manihoti) feeding
Source: PubMed Central journal article supplement (PMC6105004; doi:10.1371/journal.pone.0202541), 2018-08-22
Supplement: pone.0202541.s002.pdf [file pone.0202541.s002.pdf]

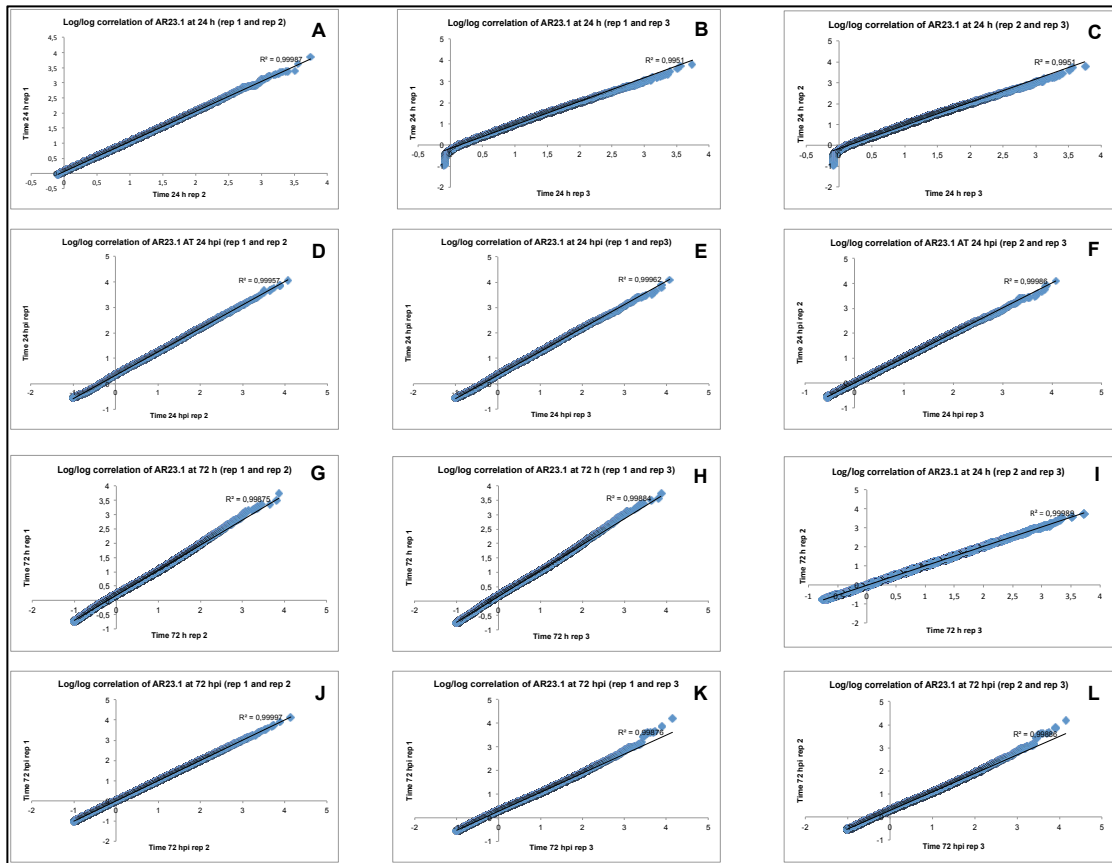

**S2\_Fig: The log/log correlations of AR23.1 leaf samples infested with mealybugs (24 and 72 hours post infestation) compared to non-infested controls. Images A-C show correlations of 3 biological replicates at 24 h (non-infested control), D-F show correlations of 3 biological replicates at 24 hpi (infested at 24 h), G-I show correlations of 3 biological replicates at 72 h (non-infested control), while J-L show correlations of 3 biological replicates at 72 hpi (infested at 72 h).**
