# Supplementary material for: The early transcriptome response of cassava (Manihot esculenta Crantz) to mealybug (Phenacoccus manihoti) feeding
Source: PubMed Central journal article supplement (PMC6105004; doi:10.1371/journal.pone.0202541), 2018-08-22
Supplement: pone.0202541.s004.pdf [file pone.0202541.s004.pdf]

| CP data of housekeeping Genes: |       |       |        |       |       |       |       |       |       |        |
|--------------------------------|-------|-------|--------|-------|-------|-------|-------|-------|-------|--------|
|                                | UBQ10 | GTPb  | EF1    | ACTIN |       |       |       |       |       |        |
|                                | HKG 1 | HKG 2 | HKG 3  | HKG 4 | HKG 5 | HKG 6 | HKG 7 | HKG 8 | HKG 9 | HKG 10 |
| n                              | 12    | 12    | 12     | 12    | 0     | 0     | 0     | 0     | 0     | 0      |
| geo Mean [CP]                  | 31,77 | 24,73 | 30,14  | 35,89 |       |       |       |       |       |        |
| ar Mean [CP]                   | 31,77 | 24,73 | 30,34  | 35,90 |       |       |       |       |       |        |
| min [CP]                       | 30,60 | 24,25 | 25,12  | 34,82 |       |       |       |       |       |        |
| max [CP]                       | 32,18 | 25,41 | 35,87  | 36,98 |       |       |       |       |       |        |
| std dev [ $\pm$ CP]            | 0,40  | 0,29  | 2,88   | 0,42  |       |       |       |       |       |        |
| CV [% CP]                      | 1,25  | 1,16  | 8,53   | 1,16  |       |       |       |       |       |        |
| min [x-fold]                   | -2,25 | -1,39 | -32,50 | -2,11 |       |       |       |       |       |        |
| max [x-fold]                   | 1,33  | 1,60  | 52,99  | 2,12  |       |       |       |       |       |        |
| std dev [ $\pm$ x-fold]        | 1,32  | 1,22  | 6,40   | 1,33  |       |       |       |       |       |        |

  

| Pearson correlation coefficient ( r ) |        |       |        |       |       |       |       |       |       |        |
|---------------------------------------|--------|-------|--------|-------|-------|-------|-------|-------|-------|--------|
| vs.                                   | HKG 1  | HKG 2 | HKG 3  | HKG 4 | HKG 5 | HKG 6 | HKG 7 | HKG 8 | HKG 9 | HKG 10 |
| HKG 2                                 | 0,570  | -     | -      | -     | -     | -     | -     | -     | -     | -      |
| p-value                               | 0,553  | -     | -      | -     | -     | -     | -     | -     | -     | -      |
| HKG 3                                 | 0,681  | 0,790 | -      | -     | -     | -     | -     | -     | -     | -      |
| p-value                               | 0,015  | 0,002 | -      | -     | -     | -     | -     | -     | -     | -      |
| HKG 4                                 | -0,460 | 0,260 | -0,053 | -     | -     | -     | -     | -     | -     | -      |
| p-value                               | 0,132  | 0,415 | 0,868  | -     | -     | -     | -     | -     | -     | -      |
| HKG 5                                 |        |       |        |       | -     | -     | -     | -     | -     | -      |
| p-value                               |        |       |        |       | -     | -     | -     | -     | -     | -      |
| HKG 6                                 |        |       |        |       |       | -     | -     | -     | -     | -      |
| p-value                               |        |       |        |       |       | -     | -     | -     | -     | -      |
| HKG 7                                 |        |       |        |       |       |       | -     | -     | -     | -      |
| p-value                               |        |       |        |       |       |       | -     | -     | -     | -      |
| HKG 8                                 |        |       |        |       |       |       |       | -     | -     | -      |
| p-value                               |        |       |        |       |       |       |       | -     | -     | -      |
| HKG 9                                 |        |       |        |       |       |       |       |       | -     | -      |
| p-value                               |        |       |        |       |       |       |       |       | -     | -      |
| HKG 10                                |        |       |        |       |       |       |       |       |       | -      |
| p-value                               |        |       |        |       |       |       |       |       |       | -      |
| BestKeeper vs.                        | HKG 1  | HKG 2 | HKG 3  | HKG 4 | HKG 5 | HKG 6 | HKG 7 | HKG 8 | HKG 9 | HKG 10 |
| coeff. of corr. [r]                   | 0,708  | 0,858 | 0,990  | 0,021 |       |       |       |       |       |        |
| p-value                               | 0,010  | 0,001 | 0,001  | 0,946 |       |       |       |       |       |        |

  

| Regression Analysis: HKG vs. BestKeeper |             |             |             |             |        |        |        |        |        |        |
|-----------------------------------------|-------------|-------------|-------------|-------------|--------|--------|--------|--------|--------|--------|
|                                         | UBQ10       | GTPb        | EF1         | ACTIN       |        |        |        |        |        |        |
| vs.                                     | HKG 1       | HKG 2       | HKG 3       | HKG 4       | HKG 5  | HKG 6  | HKG 7  | HKG 8  | HKG 9  | HKG 10 |
|                                         | vs. BK      | vs. BK      | vs. BK      | vs. BK      | vs. BK | vs. BK | vs. BK | vs. BK | vs. BK | vs. BK |
| coeff. of corr. [r]                     | 0,71        | 0,86        | 0,99        | 0,02        |        |        |        |        |        |        |
| coeff. of det. [r <sup>2</sup> ]        | 0,50        | 0,74        | 0,98        | 0,00        |        |        |        |        |        |        |
| intercept [CP]                          | 21,68       | 16,10       | -70,23      | 35,55       |        |        |        |        |        |        |
| slope [CP]                              | 0,33        | 0,28        | 3,31        | 0,01        |        |        |        |        |        |        |
| SE [CP]                                 | $\pm 0,375$ | $\pm 0,193$ | $\pm 0,536$ | $\pm 0,696$ |        |        |        |        |        |        |
| p-value                                 | 0,010       | 0,001       | 0,001       | 0,946       |        |        |        |        |        |        |
| Power of HKG [x-fold]                   | 1,26        | 1,22        | 9,92        | 1,01        |        |        |        |        |        |        |

**S4 Fig. Descriptive statistics of four candidate housekeeping genes (HKG) based on their crossing point (CP) values.** BestKeeper index is computed together with the same descriptive parameters for four genes (UBQ10, GTPb, EF1 and Actin). Abbreviations: n: number of samples; geo Mean [CP]: the geometric mean of CP; ar Mean [CP]: the arithmetic mean of CP; Min [CP] and Max [CP]: the extreme values of CP; std dev [ $\pm$ CP]: the standard deviation of the CP; CV [%CP]: the coefficient of variance expressed as a percentage on the CP level; Min [x-fold] and Max [x-fold]: the extreme values of expression levels expressed as an absolute x-fold over- or under-regulation coefficient; std dev [ $\pm$  x-fold]: standard deviation of the absolute regulation coefficients.
