# Supplementary material for: The early transcriptome response of cassava (Manihot esculenta Crantz) to mealybug (Phenacoccus manihoti) feeding
Source: PubMed Central journal article supplement (PMC6105004; doi:10.1371/journal.pone.0202541), 2018-08-22
Supplement: pone.0202541.s005.pdf [file pone.0202541.s005.pdf]

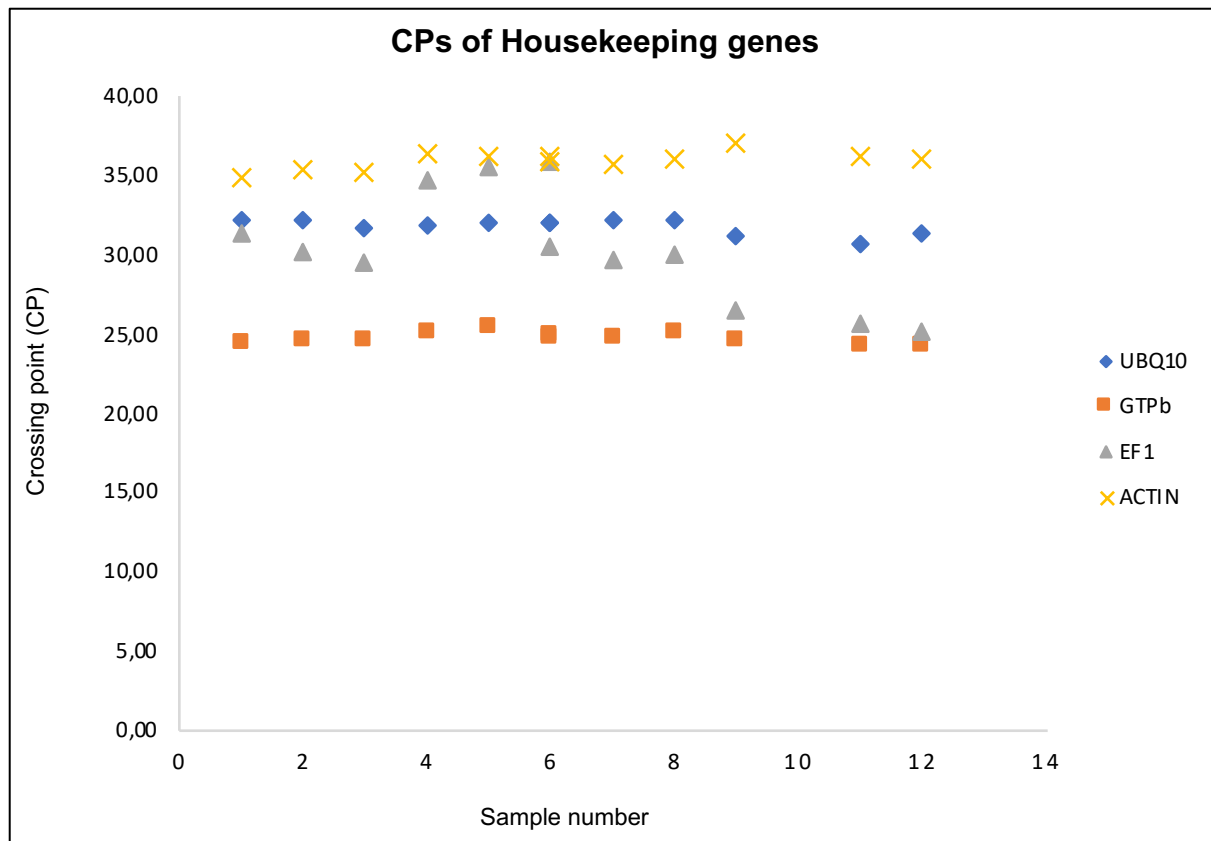

**S5 Fig. Expression stability of the four candidate housekeeping genes (UBQ10, GTPb, EF1 and Actin) in cassava leaves.** The figure illustrates the crossing points of each sample replicate for each gene.
