# Supplementary material for: The early transcriptome response of cassava (Manihot esculenta Crantz) to mealybug (Phenacoccus manihoti) feeding
Source: PubMed Central journal article supplement (PMC6105004; doi:10.1371/journal.pone.0202541), 2018-08-22
Supplement: pone.0202541.s006.pdf [file pone.0202541.s006.pdf]

**Table S1: Raw and trimmed reads generated per time point for each biological replicates and subsequent mapping to the cassava reference genome (*Mesculenta\_305\_v6.1*)**

| Genotype                      | Time (hours post infestation) | Infestation status | No. of raw reads | Trimmed reads | % Trimmed reads | Mapped reads | Mapped reads/million sequence reads |
|-------------------------------|-------------------------------|--------------------|------------------|---------------|-----------------|--------------|-------------------------------------|
| AR23,1 Biological replicate 3 | 24 h                          | Non-infested       | 21,444,473       | 19,110,834    | 89.1            | 16,921,128   | 885 420                             |
|                               | 72 h                          | Non-infested       | 29,388,325       | 25,197,198    | 85.7            | 22,067,654   | 875 797                             |
|                               | 24 hpi                        | Infested           | 42,212,956       | 41,500,026    | 98.3            | 30,032,612   | 723 538                             |
|                               | 72 hpi                        | Infested           | 45,953,442       | 41,507,964    | 90.3            | 36,210,712   | 872 379                             |
| AR23,1 Biological replicate 2 | 24 h                          | Non-infested       | 29,065,379       | 25,218,186    | 86.7            | 23,190,120   | 919 579                             |
|                               | 72 h                          | Non-infested       | 25,901,916       | 22,107,187    | 85.3            | 19,917,821   | 900 965                             |
|                               | 24 hpi                        | Infested           | 40,000,000       | 36,490,056    | 91.2            | 32,054,329   | 878 440                             |
|                               | 72 hpi                        | Infested           | 39,115,704       | 37,114,004    | 94.9            | 33,790,451   | 910 450                             |
| AR23,1 Biological replicate 3 | 24 h                          | Non-infested       | 37,694,984       | 33,107,823    | 87.7            | 29,108,912   | 879 215                             |
|                               | 72 h                          | Non-infested       | 29,614,889       | 25,108,197    | 85.0            | 21,109,432   | 840 738                             |
|                               | 24 hpi                        | Infested           | 38,453,272       | 34,989,258    | 90.9            | 32,157,979   | 919 081                             |
|                               | 72 hpi                        | Infested           | 31,073,358       | 28,957,014    | 93.1            | 23,822,215   | 822 675                             |
| P40/1 Biological replicate 1  | 24 h                          | Non-infested       | 32,536,388       | 28,927,448    | 89.0            | 24,978,358   | 863 482                             |
|                               | 72 h                          | Non-infested       | 29,514,034       | 25,216,917    | 85.4            | 22,421,686   | 889 152                             |
|                               | 24 hpi                        | Infested           | 29,378,808       | 27,764,750    | 93.3            | 22,816,550   | 821 781                             |
|                               | 72 hpi                        | Infested           | 23,424,700       | 20,774,916    | 88.7            | 19,526,920   | 843 657                             |
| P40/1 Biological replicate 2  | 24 h                          | Non-infested       | 26,937,496       | 23,928,218    | 89.0            | 20,684,329   | 864 432                             |
|                               | 72 h                          | Non-infested       | 26,726,775       | 24,210,721    | 90.5            | 20,463,976   | 845 244                             |
|                               | 24 hpi                        | Infested           | 35,954,764       | 34, 860,410   | 96.9            | 31,986,993   | 917 573                             |
|                               | 72 hpi                        | Infested           | 33,394,144       | 32,224,992    | 95.0            | 25,158,790   | 780 722                             |
| P40/1 Biological replicate 3  | 24 h                          | Non-infested       | 22,016,380       | 20,219,012    | 91.0            | 17,989,129   | 889 713                             |
|                               | 72 h                          | Non-infested       | 29,663,515       | 26,018,219    | 88.0            | 22,129,719   | 850 547                             |
|                               | 24 hpi                        | Infested           | 33,346,560       | 28,740,636    | 86.1            | 24,109,731   | 838 872                             |
|                               | 72 hpi                        | Infested           | 38,371,700       | 37,807,994    | 98.5            | 30,223,924   | 799 405                             |
