# Supplementary material for: The early transcriptome response of cassava (Manihot esculenta Crantz) to mealybug (Phenacoccus manihoti) feeding
Source: PubMed Central journal article supplement (PMC6105004; doi:10.1371/journal.pone.0202541), 2018-08-22
Supplement: pone.0202541.s009.pdf [file pone.0202541.s009.pdf]

**Table S4: Gene Ontologies (GO) for AR23.1 and P40/1 cassava genotypes following mealybug infestation categorized in Biological process, Molecular function and Cellular component.**

| GO term                     | Gene ID         | GO ID                                       | Gene annotation                                                         |
|-----------------------------|-----------------|---------------------------------------------|-------------------------------------------------------------------------|
| <b>Biological process</b>   |                 |                                             | UDP-Glycosyltransferase superfamily protein                             |
| <b>1. Metabolic process</b> | Manes.02G054300 | GO:0016758,GO:0008152                       | cytochrome P450, family 77, subfamily A, polypeptide 5 pseudogene       |
|                             | Manes.02G071200 | GO:0008152,GO:0003824                       | Terpenoid cyclases/Protein                                              |
|                             | Manes.02G086200 | GO:0016829,GO:0010333,GO:0008152,GO:0000287 | prenyltransferases superfamily protein                                  |
|                             | Manes.12G076600 | GO:0016829,GO:0010333,GO:0008152,GO:0000287 | Terpene synthase 10                                                     |
|                             | Manes.16G016100 | GO:0016829,GO:0010333,GO:0008152,GO:0000287 | Terpene synthase 14                                                     |
|                             | Manes.S099100   | GO:0016829,GO:0010333,GO:0008152,GO:0000287 | Terpene synthase-like sequence-1,8-cineole                              |
|                             | Manes.01G231100 | GO:0055114,GO:0016491                       | Tibberellin 2-oxidase 6                                                 |
|                             | Manes.01G274900 | GO:0055114,GO:0016491,GO:0006633,GO:0005506 | Fatty acid hydroxylase superfamily                                      |
|                             | Manes.03G032500 | GO:0055114,GO:0016491                       | ACC oxidase 1                                                           |
|                             | Manes.04G120100 | GO:0055114,GO:0016491                       | 2-oxoglutarate (2OG) and Fe(II)-dependent oxygenase superfamily protein |
|                             | Manes.08G002700 | GO:0055114,GO:0020037,GO:0006979,GO:0004601 | Tscorbate peroxidase 2                                                  |
|                             | Manes.10G071700 | GO:0055114,GO:0020037,GO:0051536,GO:0020037 | Titrite reductase 1                                                     |
|                             | Manes.10G146700 | GO:0055114,GO:0020037,GO:0016705,GO:0005506 | Tytochrome P450, family 705, subfamily A, polypeptide 27                |
|                             | Manes.14G051800 | GO:0055114,GO:0020037,GO:0016705,GO:0005506 | Tytochrome P450, family 94, subfamily B, polypeptide 3                  |
|                             | Manes.15G121600 | GO:0055114,GO:0016491                       | Tibberellin 2-oxidase                                                   |
|                             | Manes.S113100   | GO:0045156,GO:0019684,GO:0009772            | Thotosystem II reaction center protein A                                |
|                             | Manes.01G110800 | GO:0008270,GO:0005975,GO:0004476,GO:0009298 | Mannose-6-phosphate isomerase, type I                                   |
|                             | Manes.S113700   | GO:0016984,GO:0015977,GO:0000287            | Tibulose-bisphosphate carboxylases                                      |
|                             | Manes.01G192100 | GO:0045454,GO:0015035,GO:0006662            | Thioredoxin H-type 7                                                    |
|                             | Manes.02G212800 | GO:0006529,GO:0004066                       | Glutamine-dependent asparagine synthase 1                               |

---

|                              |                 |                                                                                            |                                                                                                             |
|------------------------------|-----------------|--------------------------------------------------------------------------------------------|-------------------------------------------------------------------------------------------------------------|
|                              | Manes.01G242300 | GO:0043565,GO:0006355,GO:0003700,GO:0003677                                                | Homeobox 7<br>Integrase-type DNA-binding superfamily protein                                                |
|                              | Manes.03G044100 | GO:0006355,GO:0003700                                                                      | Ethylene responsive element binding factor 1                                                                |
|                              | Manes.06G131100 | GO:0006355,GO:0003700<br>GO:0008270,GO:0006355,GO:0005634,GO:0004402,GO:0003712,GO:0005515 | BTB and TAZ domain protein 4<br>mRNA splicing factor, thioredoxin-like U5 snRNP                             |
| <b>2. Cellular process</b>   | Manes.03G120700 | :0000398                                                                                   | C-repeat-binding factor 4                                                                                   |
|                              | Manes.01G067400 | GO:0006355,GO:0003700                                                                      | Ethylene responsive element binding factor 1                                                                |
|                              | Manes.01G085400 | GO:0006355,GO:0003700                                                                      | NAC domain containing protein 42                                                                            |
|                              | Manes.02G089000 | GO:0006355,GO:0003677                                                                      | Integrase-type DNA-binding superfamily protein                                                              |
|                              | Manes.03G056100 | GO:0006355,GO:0003700                                                                      | Ethylene responsive element binding factor 1                                                                |
|                              | Manes.06G131100 | GO:0006355,GO:0003700<br>GO:0008270,GO:0006355,GO:0005634,GO:0004402,GO:0003712,GO:0005515 | BTB and TAZ domain protein 4<br>Integrase-type DNA-binding superfamily protein                              |
|                              | Manes.13G112500 | 03712,GO:0005515                                                                           | Integrase-type DNA-binding superfamily protein                                                              |
|                              | Manes.03G044100 | GO:0006355,GO:0003700<br>GO:0045454,GO:0015035,GO:0009055                                  | Glutaredoxin family protein<br>D-mannose binding lectin protein with Apple-like carbohydrate-binding domain |
|                              | Manes.15G015600 | :0009055                                                                                   | Cytochrome C assembly protein                                                                               |
|                              | Manes.15G094100 | GO:0048544                                                                                 | ATP binding microtubule motor family protein                                                                |
| <b>3. Response to stress</b> | Manes.07G086000 | GO:0020037,GO:0017004<br>GO:0008017,GO:0007018,GO:0005524,GO:0003777,GO:0005871            | Late embryogenesis abundant 3 (LEA3) family protein                                                         |
|                              | Manes.05G132500 | 05871                                                                                      | Peroxidase superfamily protein                                                                              |
|                              | Manes.05G061300 | GO:0006950<br>GO:0055114,GO:0020037,GO:0006979,GO:0004601                                  | Peroxidase superfamily protein                                                                              |
|                              | Manes.01G065500 | :0006979,GO:0004601<br>GO:0055114,GO:0020037,GO:0006979,GO:0004601                         | Peroxidase superfamily protein                                                                              |
|                              | Manes.02G025800 | :0006979,GO:0004601<br>GO:0055114,GO:0020037,GO:0006979,GO:0004601                         | Peroxidase superfamily protein                                                                              |
|                              | Manes.02G026300 | :0006979,GO:0004601<br>GO:0055114,GO:0020037,GO:0006979,GO:0004601                         | Escorbate peroxidase 2                                                                                      |
|                              | Manes.08G002700 | :0006979,GO:0004601                                                                        | P-loop containing nucleoside                                                                                |
|                              | Manes.02G015400 | GO:0009378,GO:0006310,GO                                                                   |                                                                                                             |

---

|                              |                          |                                                                      |
|------------------------------|--------------------------|----------------------------------------------------------------------|
|                              | :0006281                 | triphosphate hydrolases superfamily protein                          |
|                              | GO:0030983,GO:0006298,GO |                                                                      |
| Manes.01G020600              | :0005524                 | MUTS homolog 2                                                       |
|                              | GO:0030983,GO:0006298,GO |                                                                      |
| Manes.01G082400              | :0005524                 | MUTS-like protein 4                                                  |
|                              |                          | Seven transmembrane MLO family protein                               |
| Manes.02G106500              | GO:0016021,GO:0006952    |                                                                      |
|                              |                          | Polyketide cyclase/dehydrase and lipid transport superfamily protein |
| Manes.15G130200              | GO:0009607,GO:0006952    |                                                                      |
| Manes.15G130300              | GO:0009607,GO:0006952    | MLP-like protein 43                                                  |
|                              |                          | Seven transmembrane MLO family protein                               |
| Manes.13G141100              | GO:0016021,GO:0006952    |                                                                      |
| Manes.15G130000              | GO:0009607,GO:0006952    | MLP-like protein 28                                                  |
| Manes.17G079800              | GO:0009607,GO:0006952    | MLP-like protein 28                                                  |
| Manes.08G135200              | GO:0050832,GO:0042742    | Pathogenesis-related 4                                               |
|                              | GO:0008061,GO:0050832,GO |                                                                      |
| Manes.08G135300              | :0042742                 | Pathogenesis-related 4                                               |
| <b>Molecular function</b>    |                          | Phytochrome P450, family 77, subfamily                               |
| <b>1. Catalytic activity</b> |                          | A, polypeptide 5 pseudogene                                          |
| Manes.02G071200              | GO:0008152,GO:0003824    |                                                                      |
|                              | GO:0003824,GO:0006470,GO |                                                                      |
| Manes.02G128000              | :0004722                 | Highly ABA-induced PP2C gene 3                                       |
| Manes.17G070900              | GO:0003824               | Camelliol C synthase 1                                               |
|                              | GO:0016829,GO:0010333,GO |                                                                      |
| Manes.08G138500              | :0000287                 | Terpene synthase 21                                                  |
|                              | GO:0016829,GO:0010333,GO |                                                                      |
| Manes.12G076600              | :0008152,GO:0000287      | Terpene synthase 10                                                  |
|                              | GO:0016829,GO:0010333,GO |                                                                      |
| Manes.16G016100              | :0008152,GO:0000287      | Terpene synthase 14                                                  |
|                              | GO:0016984,GO:0015977,GO |                                                                      |
| Manes.S113700                | :0000287                 | Ribulose-bisphosphate carboxylases                                   |
| Manes.17G116800              | GO:0008270,GO:0004089    | Carbonic anhydrase 1                                                 |
|                              | GO:0016829,GO:0010333,GO | terpene synthase-like sequence-1,8-                                  |
| Manes.S099100                | :0008152,GO:0000287      | cineole                                                              |
|                              | GO:0016887,GO:0005524,GO |                                                                      |
| Manes.03G018600              | :0016020                 | Pleiotropic drug resistance 12                                       |
|                              |                          | Eukaryotic aspartyl protease family protein                          |
| Manes.02G039000              | GO:0006508,GO:0004190    |                                                                      |
|                              |                          | Eukaryotic aspartyl protease family protein                          |
| Manes.02G145900              | GO:0006508,GO:0004190    |                                                                      |
|                              |                          | Eukaryotic aspartyl protease family protein                          |
| Manes.16G132600              | GO:0006508,GO:0004190    |                                                                      |
| Manes.07G059300              | GO:0005975,GO:0004553    | Glycosyl hydrolase superfamily protein                               |
| Manes.01G076500              | GO:0004575,GO:0004564    | Glycosyl hydrolases family 32 protein                                |

---

|                   |                 |                           |                                          |
|-------------------|-----------------|---------------------------|------------------------------------------|
|                   |                 | GO:0042545,GO:0030599,GO  |                                          |
| <b>2. Binding</b> | Manes.01G231200 | :0005618                  | Pectin lyase-like superfamily protein    |
|                   |                 | GO:0008270,GO:0005975,GO  |                                          |
|                   | Manes.01G110800 | :0004476,GO:0009298       | Mannose-6-phosphate isomerase, type I    |
|                   |                 | GO:0008270,GO:0006355,GO  |                                          |
|                   |                 | :0005634,GO:0004402,GO:00 |                                          |
|                   | Manes.13G112500 | 03712,GO:0005515          | BTB and TAZ domain protein 4             |
|                   |                 | GO:0006468,GO:0005524,GO  |                                          |
|                   | Manes.01G013000 | :0004672                  | Wall-associated kinase family protein    |
|                   |                 | GO:0030983,GO:0006298,GO  |                                          |
|                   | Manes.01G020600 | :0005524                  | MUTS homolog 2                           |
|                   |                 | GO:0006355,GO:0005634,GO  |                                          |
|                   |                 | :0005524,GO:0032502,GO:00 |                                          |
|                   | Manes.01G070800 | 06351                     | Growth-regulating factor 2               |
|                   |                 | GO:0005509,GO:0006468,GO  |                                          |
|                   | Manes.02G170200 | :0005524,GO:0004672       | Wall associated kinase 3                 |
|                   |                 |                           | Protein kinase protein with adenine      |
|                   |                 | GO:0006468,GO:0005524,GO  | nucleotide alpha hydrolases-like         |
|                   | Manes.02G172500 | :0004672                  | domain                                   |
|                   |                 | GO:0016887,GO:0005524,GO  |                                          |
|                   | Manes.03G018600 | :0016020                  | Pleiotropic drug resistance 12           |
|                   |                 |                           | protein serine/threonine kinases;protein |
|                   |                 | GO:0006468,GO:0005524,GO  | Kinases;ATP binding;sugar                |
|                   | Manes.03G076800 | :0004672                  | binding;kinases;carbohydrate binding     |
|                   |                 | GO:0008017,GO:0007018,GO  |                                          |
|                   |                 | :0005524,GO:0003777,GO:00 | ATP binding microtubule motor family     |
|                   | Manes.05G132500 | 05871                     | protein                                  |
|                   |                 | GO:0016887,GO:0005524,GO  |                                          |
|                   | Manes.06G154000 | :0016020                  | ABC-2 type transporter family protein    |
|                   |                 | GO:0016887,GO:0005524,GO  | White-brown complex homolog protein      |
|                   | Manes.10G105100 | :0016020                  | 11                                       |
|                   |                 |                           | Integrase-type DNA-binding               |
|                   | Manes.03G056100 | GO:0006355,GO:0003700     | superfamily protein                      |
|                   |                 |                           | Ethylene responsive element binding      |
|                   | Manes.06G131100 | GO:0006355,GO:0003700     | factor 1                                 |
|                   |                 | GO:0016829,GO:0010333,GO  |                                          |
|                   | Manes.08G138500 | :0000287                  | Terpene synthase 21                      |
|                   |                 | GO:0016829,GO:0010333,GO  |                                          |
|                   | Manes.12G076600 | :0008152,GO:0000287       | Terpene synthase 10                      |
|                   |                 | GO:0016829,GO:0010333,GO  |                                          |
|                   | Manes.16G016100 | :0008152,GO:0000287       | Terpene synthase 14                      |
|                   |                 | GO:0016829,GO:0010333,GO  | Terpene synthase-like sequence-1,8-      |
|                   | Manes.S099100   | :0008152,GO:0000287       | cineole                                  |
|                   | Manes.S113700   | GO:0016984,GO:0015977,GO  | Ribulose-bisphosphate carboxylases       |

---

|                           |                 |                                                                              |                                                          |
|---------------------------|-----------------|------------------------------------------------------------------------------|----------------------------------------------------------|
|                           |                 | :0000287                                                                     |                                                          |
|                           | Manes.10G146700 | GO:0055114,GO:0020037,GO:0016705,GO:0005506                                  | Cytochrome P450, family 705, subfamily A, polypeptide 27 |
|                           | Manes.14G051800 | GO:0055114,GO:0020037,GO:0016705,GO:0005506                                  | Cytochrome P450, family 94, subfamily B, polypeptide 3   |
|                           | Manes.08G002700 | GO:0055114,GO:0020037,GO:0006979,GO:0004601                                  | Ascorbate peroxidase 2                                   |
|                           | Manes.17G098200 | GO:0020037,GO:0019825                                                        | Hemoglobin 1                                             |
| <b>Cellular component</b> |                 | GO:0008270,GO:0006355,GO:0005634,GO:0004402,GO:0003712,GO:0005515            |                                                          |
| <b>1. Cell</b>            | Manes.13G112500 | GO:0005515                                                                   | BTB and TAZ domain protein 4                             |
|                           | Manes.14G006300 | GO:0005515                                                                   | CCT motif family protein                                 |
|                           | Manes.14G096200 | GO:0005515                                                                   | RNI-like superfamily protein                             |
|                           | Manes.03G066400 | GO:0016021,GO:0015116,GO:0008272,GO:0055085,GO:0016020,GO:0008271,GO:1902358 | Sulfate transporter 3;5                                  |
|                           | Manes.04G094700 | GO:0071805,GO:0016020,GO:0015079                                             | K <sup>+</sup> uptake transporter 3                      |
|                           | Manes.06G154000 | GO:0016887,GO:0005524,GO:0016020                                             | ABC-2 type transporter family protein                    |
|                           | Manes.09G062300 | GO:0016020,GO:0006810,GO:0005215                                             | Gamma tonoplast intrinsic protein                        |
|                           | Manes.10G105100 | GO:0016887,GO:0005524,GO:0016020                                             | white-brown complex homolog protein 11                   |
|                           | Manes.01G086900 | GO:0055085,GO:0016021                                                        | Major facilitator superfamily protein                    |
|                           | Manes.01G161800 | GO:0055085,GO:0016021                                                        | Cation exchanger 3                                       |
|                           | Manes.02G040000 | GO:0016021,GO:0016020,GO:0022857                                             | Nodulin MtN21 /EamA-like transporter family protein      |
|                           | Manes.02G106500 | GO:0016021,GO:0006952                                                        | Seven transmembrane MLO family protein                   |
|                           | Manes.13G112500 | GO:0008270,GO:0006355,GO:0005634,GO:0004402,GO:0003712,GO:0005515            | BTB and TAZ domain protein 4                             |
| <b>2. Cell part</b>       | Manes.05G132500 | GO:0008017,GO:0007018,GO:0005524,GO:0003777,GO:0005871                       | ATP binding microtubule motor family protein             |
|                           | Manes.03G120700 | GO:0045454,GO:0005681,GO:0000398                                             | mRNA splicing factor, thioredoxin-like U5 snRNP          |
|                           | Manes.02G039500 | GO:0042545,GO:0030599,GO:0005618                                             | Pectin lyase-like superfamily protein                    |
|                           | Manes.01G067000 | GO:0055085,GO:0016020,GO:0015297,GO:0015238,GO:0006855                       | MATE efflux family protein                               |

---

|                 |                                                                                |                                                        |
|-----------------|--------------------------------------------------------------------------------|--------------------------------------------------------|
| Manes.01G108600 | GO:0016020                                                                     | Uncharacterized protein family (UPF0016)               |
| Manes.01G254100 | GO:0016757,GO:0016020<br>GO:0055085,GO:0016020,GO:0015297,GO:0015238,GO:006855 | Protein of unknown function (DUF604)                   |
| Manes.02G032300 | GO:0016021,GO:0016020,GO:0022857                                               | MATE efflux family protein                             |
| Manes.02G040000 | GO:0055085,GO:0016020,GO:0006811,GO:0005216                                    | Nodulin MtN21 /EamA-like transporter family protein    |
| Manes.02G051000 | GO:0033177,GO:0015991,GO:0015078                                               | Cyclic nucleotide-regulated ion channel family protein |
| Manes.S091000   | GO:0055085,GO:0016020,GO:0006811,GO:0005216                                    | ATP synthase subunit C family protein                  |
| Manes.02G051100 | GO:0008270,GO:0006355,GO:0005634,GO:0004402,GO:003712,GO:0005515               | Cyclic nucleotide-regulated ion channel family protein |
| Manes.13G112500 | GO:0045454,GO:0005681,GO:0000398                                               | BTB and TAZ domain protein 4                           |
| Manes.03G120700 | GO:0008017,GO:0007018,GO:0005524,GO:0003777,GO:0005871                         | mRNA splicing factor, thioredoxin-like U5 snRNP        |
| Manes.05G132500 | GO:0042545,GO:0030599,GO:0005618                                               | ATP binding microtubule motor family protein           |
| Manes.02G039500 |                                                                                | Pectin lyase-like superfamily protein                  |

---
